# Supplementary material for: Simple rapid stabilization method through citric acid modification for magnetite nanoparticles
Source: PubMed Central journal article supplement (PMC7330025; doi:10.1038/s41598-020-67869-8), 2020-07-01
Supplement: 41598_2020_67869_MOESM1_ESM.pdf [file 41598_2020_67869_MOESM1_ESM.pdf]

**Supplementary information**

**Simple Rapid Stabilization Method through Citric Acid  
Modification for Magnetite Nanoparticles**

Mohammed Ali Dheyab<sup>1,2\*</sup>, Azlan Abdul Aziz<sup>1,2\*</sup>, Mahmood S Jameel<sup>1,2</sup>, Osama Abu Noqta<sup>1,2</sup>,  
Pegah Moradi Khaniabadi<sup>1,2</sup>, Baharak Mehrdel<sup>1,2</sup>

<sup>1</sup>Nano-Biotechnology Research and Innovation (NanoBRI), Institute for Research in Molecular  
Medicine (INFORMM), Universiti Sains Malaysia, 11800, Pulau Pinang, Malaysia

<sup>2</sup>Nano-Optoelectronics Research and Technology Lab (NORLab), School of Physics,  
Universiti Sains Malaysia, 11800 Pulau Pinang, Malaysia.

\*Corresponding author: [mohammed@student.usm.my](mailto:mohammed@student.usm.my), [lan@usm.my](mailto:lan@usm.my)

\*Correspondence and requests for materials should be addressed to M.A.D and A.A.A. (email:  
[mohammed@student.usm.my](mailto:mohammed@student.usm.my), [lan@usm.my](mailto:lan@usm.my); 0060136460997).

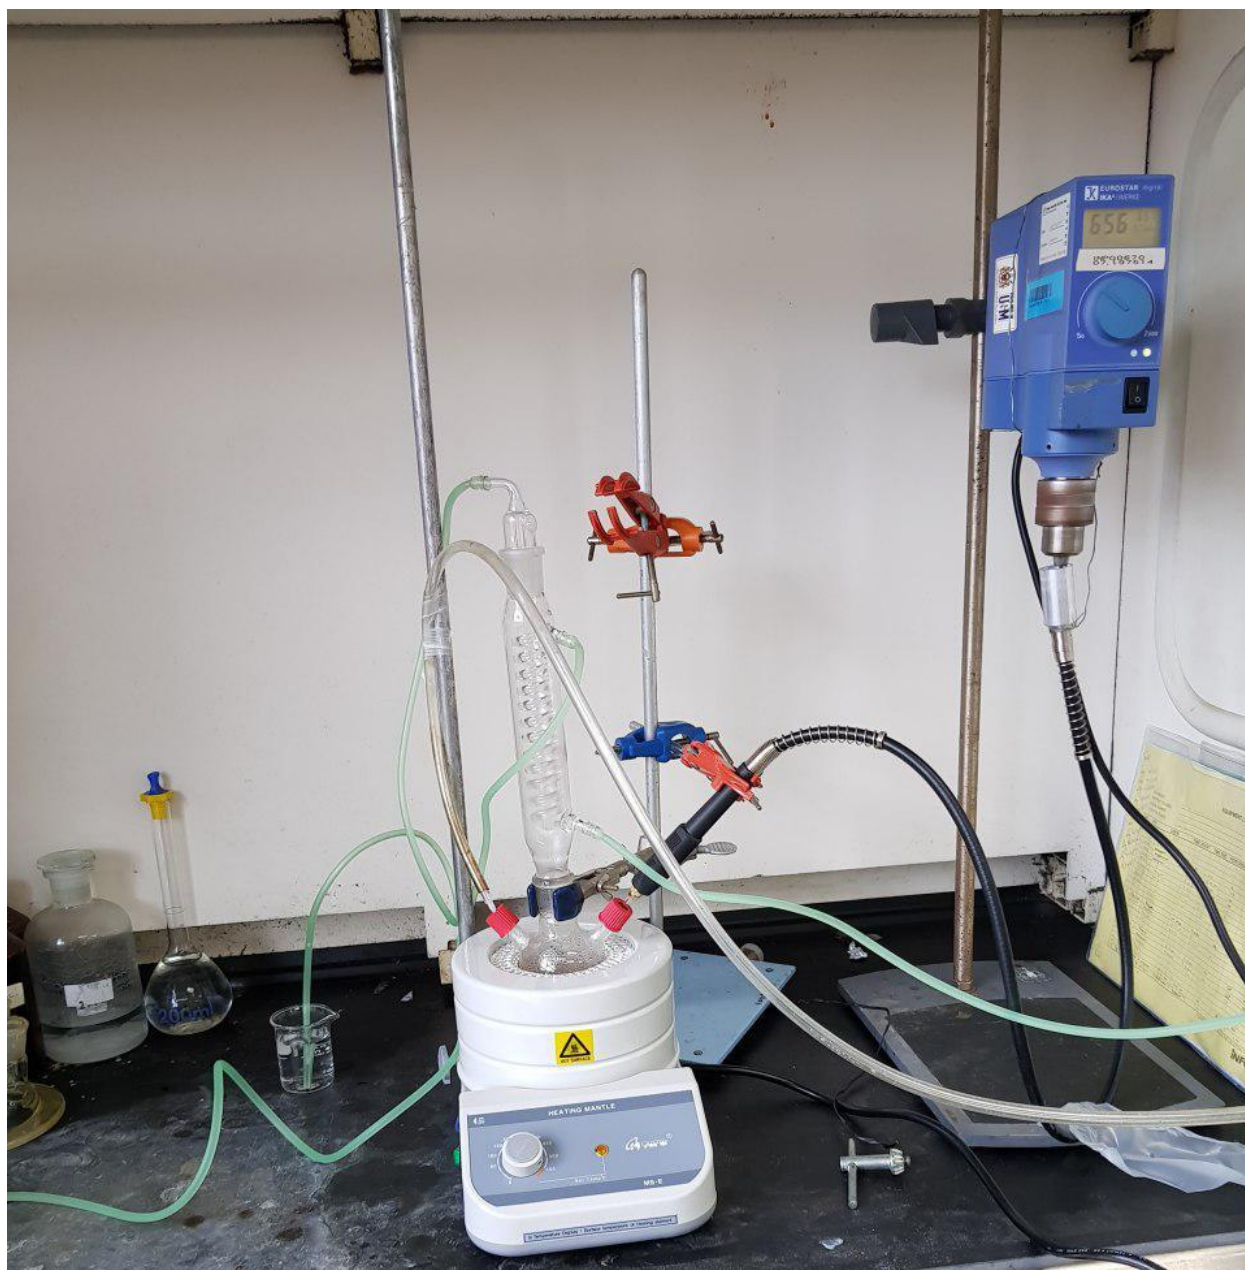

**Supplementary Figure S1.** These experimental setups and equipment were used to produce  $\text{Fe}_3\text{O}_4@\text{CA}$  nanoparticles.
